# Supplementary material for: Non-home discharge after cardiac surgery in Australia and New Zealand: a cross-sectional study
Source: HighWire-hosted journal article supplement (doi:10.1136/bmjopen-2021-049187), 2021-12-01
Supplement: bmjopen-2021-049187supp001_data_supplement.pdf [file bmjopen-2021-049187supp001_data_supplement.pdf]

**SUPPLEMENTAL MATERIAL**

Title: Non-home discharge after cardiac surgery  
Authors: Mahesh Ramanan, Aashish Kumar, Christopher Anstey, Kiran Shekar.

**Contents**

Supplemental Table 1: Non-home discharge locations.....Page 2

Supplemental Table 2: Raw trends in APACHE-2 comorbidities.....Page 3

Supplemental Table 3: Regression table stratified by surgery type.....Page 4

Supplemental Table 4: Regression table stratified by surgery type with APAHCE-3 score.....Page 4

Supplemental Table 5: Private and Public hospitals comparison .....Page 5

Supplemental Figure 1: Raw trends in CABG patients .....Page 6

Supplemental Figure 2: Raw trends in valve surgery patients .....Page 6

Supplemental Figure 3: Raw trends in CABG + valve surgery patients .....Page 7

Supplemental Table 6: Variance inflation factors.....Page 8

Supplemental Table 1: Non-home discharge locations

| Discharge location | n(%)             | Non-home discharge locations                         | n(%)         |
|--------------------|------------------|------------------------------------------------------|--------------|
| Died in hospital   | 210<br>(1.2%)    | Nursing home                                         | 188 (11.3%)  |
| Home               | 14569<br>(82.6%) | Rehabilitation                                       | 1127 (67.5%) |
| Other hospital     | 1194<br>(6.8%)   | Mental Health                                        | 7 (0.4%)     |
| Non-home discharge | 1670<br>(9.5%)   | Hospital in the home                                 | 310 (18.6%)  |
| Total              | 17643            | Other (palliative care/chronic care facility/others) | 38 (2.3%)    |
|                    |                  | Total                                                | 1670         |

Supplemental Table 2: Raw trends in APACHE-2 comorbidities

| Year | Respiratory | Cardiovascular | Hepatic | Renal |
|------|-------------|----------------|---------|-------|
| 2004 | 6.4%        | 25.1%          | 0.11%   | 1.2%  |
| 2005 | 5.9%        | 22.8%          | 0.11%   | 1.6%  |
| 2006 | 3.2%        | 21.9%          | 0.14%   | 1.6%  |
| 2007 | 3.3%        | 20.3%          | 0.16%   | 1.8%  |
| 2008 | 2.4%        | 16.9%          | 0.17%   | 1.8%  |
| 2009 | 3.1%        | 17.2%          | 0.16%   | 1.7%  |
| 2010 | 2.9%        | 16.7%          | 0.23%   | 1.7%  |
| 2011 | 2.7%        | 12.7%          | 0.15%   | 1.9%  |
| 2012 | 2.9%        | 13.6%          | 0.26%   | 1.8%  |
| 2013 | 3.3%        | 13.4%          | 0.21%   | 1.8%  |
| 2014 | 3.2%        | 14.0%          | 0.22%   | 1.8%  |
| 2015 | 3.2%        | 12.8%          | 0.32%   | 1.9%  |
| 2016 | 3.3%        | 12.2%          | 0.25%   | 1.7%  |
| 2017 | 3.2%        | 12.6%          | 0.34%   | 1.6%  |
| 2018 | 2.9%        | 12.4%          | 0.25%   | 2.0%  |
| 2019 | 3.2%        | 13.7%          | 0.27%   | 1.9%  |

Supplemental Table 3: Multivariable logistic regression model stratified by surgery type with baseline variables

| Variable | CABG                 |         | Valve                |         | CABG + Valve         |         |
|----------|----------------------|---------|----------------------|---------|----------------------|---------|
|          | OR<br>(95% CI)       | p-value | OR<br>(95% CI)       | p-value | OR<br>(95% CI)       | p-value |
| Year     | 1.01<br>(1.00, 1.01) | 0.047   | 0.99<br>(0.98, 1.01) | 0.668   | 0.98<br>(0.97, 0.99) | 0.006   |
| Age      | 1.08<br>(1.07, 1.08) | < 0.001 | 1.06<br>(1.05, 1.07) | < 0.001 | 1.07<br>(1.06, 1.08) | < 0.001 |
| Sex      | 1.75<br>(1.65, 1.85) | < 0.001 | 1.78<br>(1.67, 1.89) | < 0.001 | 1.62<br>(1.48, 1.78) | < 0.001 |
| Status   | 0.65<br>(0.59, 0.71) | < 0.001 | 0.71<br>(0.61, 0.84) | < 0.001 | 0.88<br>(0.71, 1.10) | 0.257   |
| Type     | 2.30<br>(1.27, 4.19) | < 0.001 | 1.88<br>(1.03, 3.40) | 0.039   | 2.45<br>(1.38, 4.23) | 0.002   |

Supplemental Table 4: Multivariable logistic regression model stratified by surgery type with baseline variables and APACHE-3 score

| Variable | CABG                 |         | Valve                |         | CABG + Valve         |         |
|----------|----------------------|---------|----------------------|---------|----------------------|---------|
|          | OR<br>(95% CI)       | p-value | OR<br>(95% CI)       | p-value | OR<br>(95% CI)       | p-value |
| Year     | 1.00<br>(0.99, 1.01) | 0.355   | 0.99<br>(0.98, 1.01) | 0.551   | 0.98<br>(0.97, 0.99) | 0.015   |
| Age      | 1.07<br>(1.06, 1.07) | < 0.001 | 1.06<br>(1.05, 1.07) | < 0.001 | 1.06<br>(1.05, 1.07) | < 0.001 |
| Sex      | 1.72<br>(1.63, 1.82) | < 0.001 | 1.77<br>(1.67, 1.89) | < 0.001 | 1.62<br>(1.47, 1.77) | < 0.001 |
| Status   | 0.67<br>(0.61, 0.73) | < 0.001 | 0.76<br>(0.65, 0.89) | 0.001   | 0.98<br>(0.78, 1.22) | 0.823   |
| Type     | 2.37<br>(1.32, 4.30) | 0.005   | 2.00<br>(1.11, 3.62) | 0.022   | 2.51<br>(1.42, 4.45) | 0.002   |
| APA3     | 1.02<br>(1.01, 1.03) | < 0.001 | 1.01<br>(1.00, 1.02) | < 0.001 | 1.02<br>(1.01, 1.03) | < 0.001 |

Supplemental Table 5: Comparison of patient characteristics and outcomes for patients undergoing cardiac surgery between public and private hospitals

| Variable                        | Public hospital<br>n=154724 | Private<br>hospital<br>n=97569 | p-<br>value <sup>a</sup> |
|---------------------------------|-----------------------------|--------------------------------|--------------------------|
| Age, y                          |                             |                                |                          |
| Median (IQR)                    | 67 (58, 74)                 | 70 (62, 77)                    | <<br>0.001               |
| Male sex                        | 115,091<br>(73.9%)          | 73,371<br>(74.6%)              | <<br>0.001               |
| APACHE-3 score, Median<br>(IQR) | 50 (41, 60)                 | 50 (40, 60)                    | <<br>0.001               |
| Non-elective surgery            | 14,173 (9.1%)               | 2,084 (2.1%)                   | <<br>0.001               |
| Surgery type                    |                             |                                |                          |
| CABG only                       | 95,886<br>(61.6%)           | 53,075<br>(53.9%)              | <0.001                   |
| Valve only                      | 42,705<br>(27.4%)           | 33,693<br>(34.2%)              |                          |
| CABG + valve                    | 17,057<br>(10.9%)           | 11,625<br>(11.8%)              |                          |
| Country                         |                             |                                |                          |
| Australia                       | 129,220<br>(56.9%)          | 98,050<br>(43.1%)              | <0.001                   |
| New Zealand                     | 26,428<br>(98.7%)           | 343 (1.3%)                     |                          |
| Hospital outcome                |                             |                                |                          |
| Died                            | 3,140 (2.0%)                | 1,162 (1.2%)                   | 0.002                    |
| Home                            | 131,547<br>(85.6%)          | 81,464<br>(85.1%)              |                          |
| Non-home discharge              | 6,342 (4.1%)                | 8,289 (8.7%)                   |                          |
| Other acute hospital            | 12,742 (8.3%)               | 4,859 (5.1%)                   |                          |

Abbreviations: Abbreviations: CABG, coronary artery bypass grafting; APACHE, Acute physiology and chronic health evaluation

a- P-values have been generated using the Wilcoxon rank-sum test for continuous variables and Fisher's exact test for categorical variables

Supplemental Figure 1: Raw trends in CABG patients

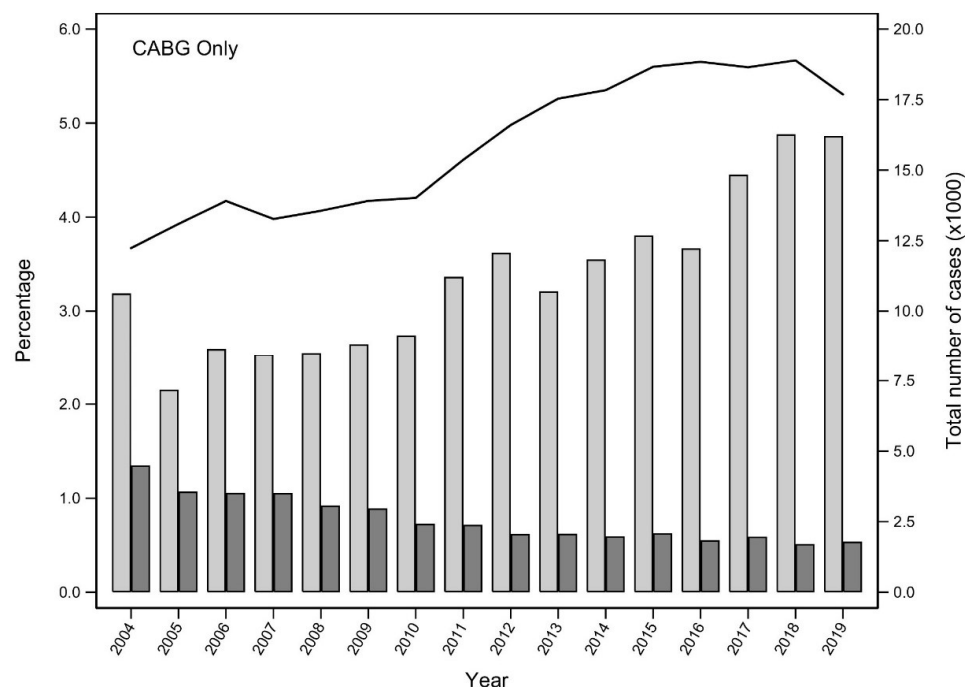

Supplemental Figure 2: Raw trends in valve surgery patients

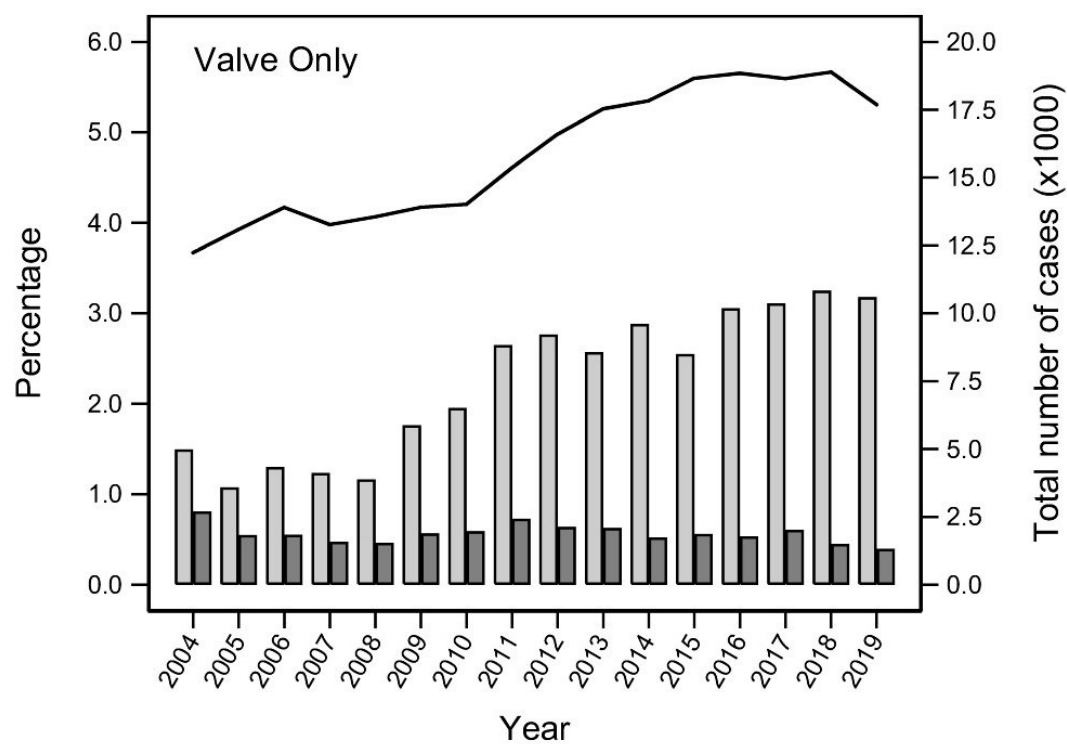

Supplemental Figure 3: Raw trends in CABG + valve surgery patients

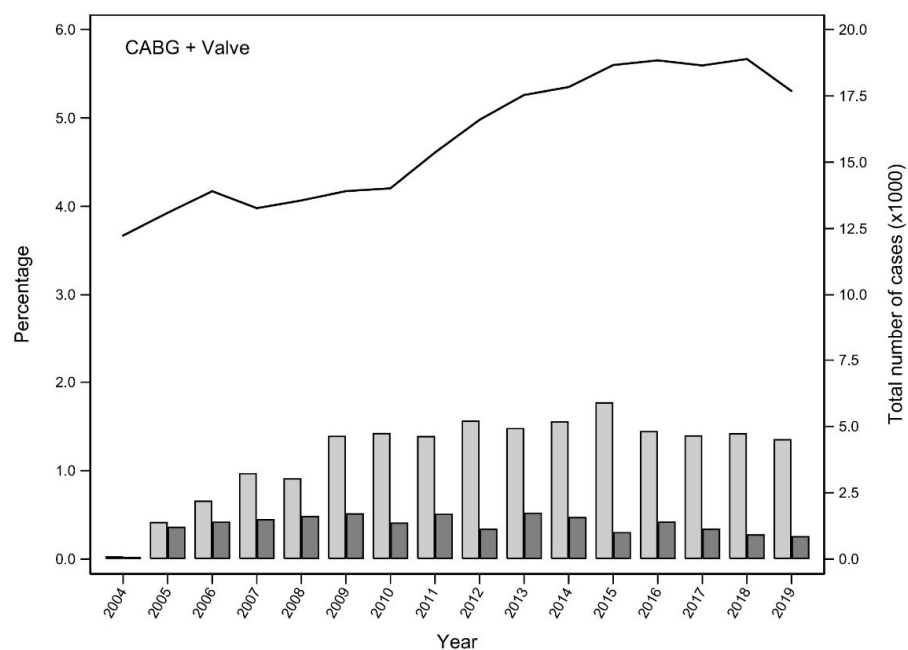

Supplemental Table 6: Variance inflation factors

| Variable        | Multivariable model <i>without</i><br>APACHE-3 score | Multivariable model <i>with</i><br>APACHE-3 score |
|-----------------|------------------------------------------------------|---------------------------------------------------|
| Year            | 6.83                                                 | 6.89                                              |
| Age             | 5.80                                                 | 6.43                                              |
| Sex             | 1.19                                                 | 1.19                                              |
| Surgery type    |                                                      |                                                   |
| Valve only      | 1.26                                                 | 1.26                                              |
| CABG + Valve    | 1.11                                                 | 1.11                                              |
| Surgical status | 4.00                                                 | 4.00                                              |
| Hospital type   | 1.31                                                 | 1.31                                              |
| APACHE-3 Score  | -                                                    | 3.67                                              |
